# Supplementary material for: Healthcare utilisation in general practice and hospitals in the year preceding a diagnosis of cancer recurrence or second primary cancer: a population-based register study
Source: PubMed Central journal article supplement (PMC6896499; doi:10.1186/s12913-019-4757-y), 2019-12-05
Supplement: 12913_2019_4757_MOESM1_ESM.pdf [file 12913_2019_4757_MOESM1_ESM.pdf]

**Additional file 1:**

Second primary cancers diagnosed between 2008 and 2016, stratified on sex, n (%)

|                                             | Women       | Men       | Total       |
|---------------------------------------------|-------------|-----------|-------------|
| Lip, oral cavity and pharynx                | 44 (2)      | 32 (4)    | 76 (3)      |
| Oesophagus and stomach                      | 46 (3)      | 36 (4)    | 82 (3)      |
| Small intestine                             | 10 (1)      | 5 (1)     | 15 (1)      |
| Colon and rectum                            | 327 (18)    | 115 (13)  | 442 (16)    |
| Other digestive organs                      | 90 (5)      | 38 (4)    | 128 (5)     |
| Lung                                        | 318 (18)    | 144 (16)  | 462 (17)    |
| Other respiratory and intrathoracic sites   | 9 (1)       | 21 (2)    | 30 (1)      |
| Malignant melanoma                          | 116 (6)     | 38 (4)    | 154 (6)     |
| Mesothelial and soft tissue                 | 30 (2)      | 15 (2)    | 45 (2)      |
| Breast                                      | 298 (17)    | *         | 298 (11)    |
| Endometrium                                 | 99 (5)      | -         | 99 (4)      |
| Ovary                                       | 60 (3)      | -         | 60 (2)      |
| Other female genital organs                 | 43 (2)      | -         | 43 (2)      |
| Male genital organs                         | -           | 252 (28)  | 252 (9)     |
| Bladder                                     | 32 (2)      | 37 (4)    | 69 (3)      |
| Other sites of the urinary tract            | 56 (3)      | 42 (5)    | 98 (4)      |
| Central nervous system                      | 35 (2)      | 17 (2)    | 52 (2)      |
| Endocrine glands                            | 29 (2)      | 7 (1)     | 36 (1)      |
| Lymphoid, haematopoietic and related tissue | 147 (8)     | 75 (8)    | 222 (8)     |
| Other                                       | 22 (1)      | 18 (2)    | 40 (1)      |
| Total                                       | 1,811 (100) | 892 (100) | 2,703 (100) |

\*Male breast cancer is reported in "Other"
